# Supplementary material for: Microfibre-Functionalised Silk Hydrogels
Source: MDPI journal article supplement (doi:10.3390/cells13010010), 2023-12-20
Supplement: s1 [file s1]

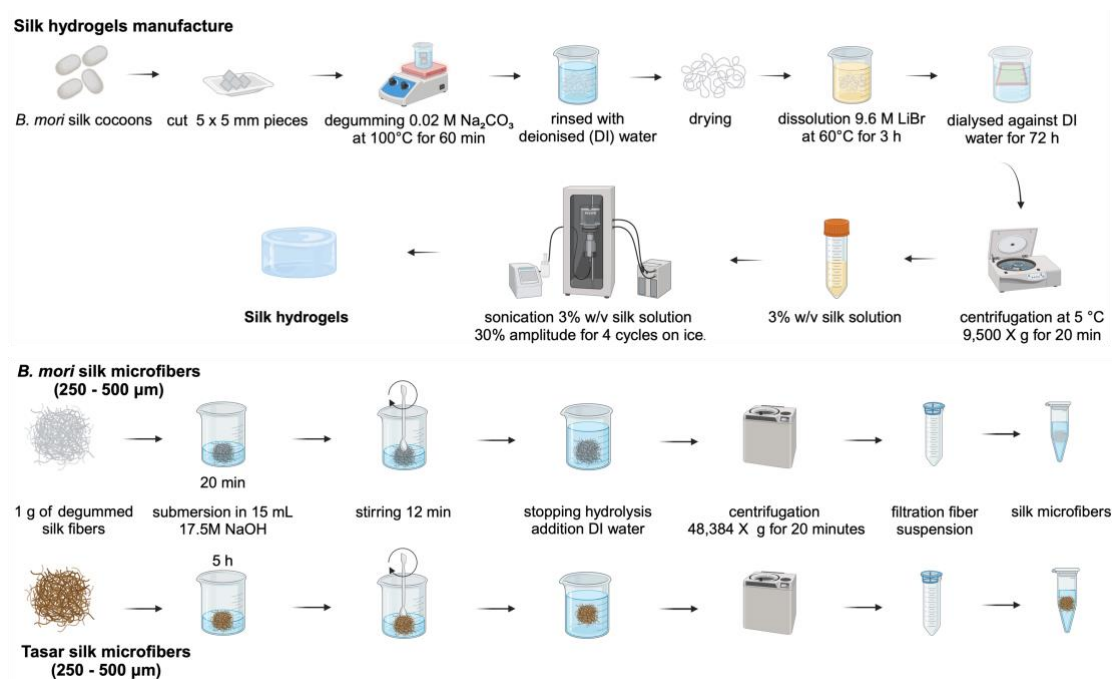

**Figure S1.** Diagram depicting the manufacture of *Bombyx mori* and *Antheraea mylitta* (Tasar) silk microfibres and *B. mori* hydrogels.
